# Supplementary material
Source: publisher figshare collection journal article supplement (https://acs.figshare.com/ndownloader/files/17991062)

## Supporting Information

---

### Synthetic Approach to ABCD ring system of Anticancer Agent Fredericamycin A via Claisen rearrangement and Ring-Closing Metathesis as key steps

Sambasivarao Kotha\*, Subba Rao Cheekatla† and Ambareen Fatma†

*Department of Chemistry, Indian Institute of Technology-Bombay, Powai, Mumbai-400076, India*

*Fax: 022-25767152; E-mail: [srk@chem.iitb.ac.in](mailto:srk@chem.iitb.ac.in)*

† Authors contributed equally

---

### Table of Contents

| Entry | Contents                                                                                | Page No. |
|-------|-----------------------------------------------------------------------------------------|----------|
| 1.    | <sup>1</sup> H and <sup>13</sup> C, and DEPT 135 NMR spectra of all new/known compounds | S2-S17   |
| 2.    | Mass spectral data of compound <b>3F</b>                                                | S17-S19  |

---

*Copies of  $^1\text{H}$ ,  $^{13}\text{C}$  and DEPT135 NMR spectra*

Figure S1a:  $^1\text{H}$  NMR of Compound 6 (500 MHz,  $\text{CDCl}_3$ ):

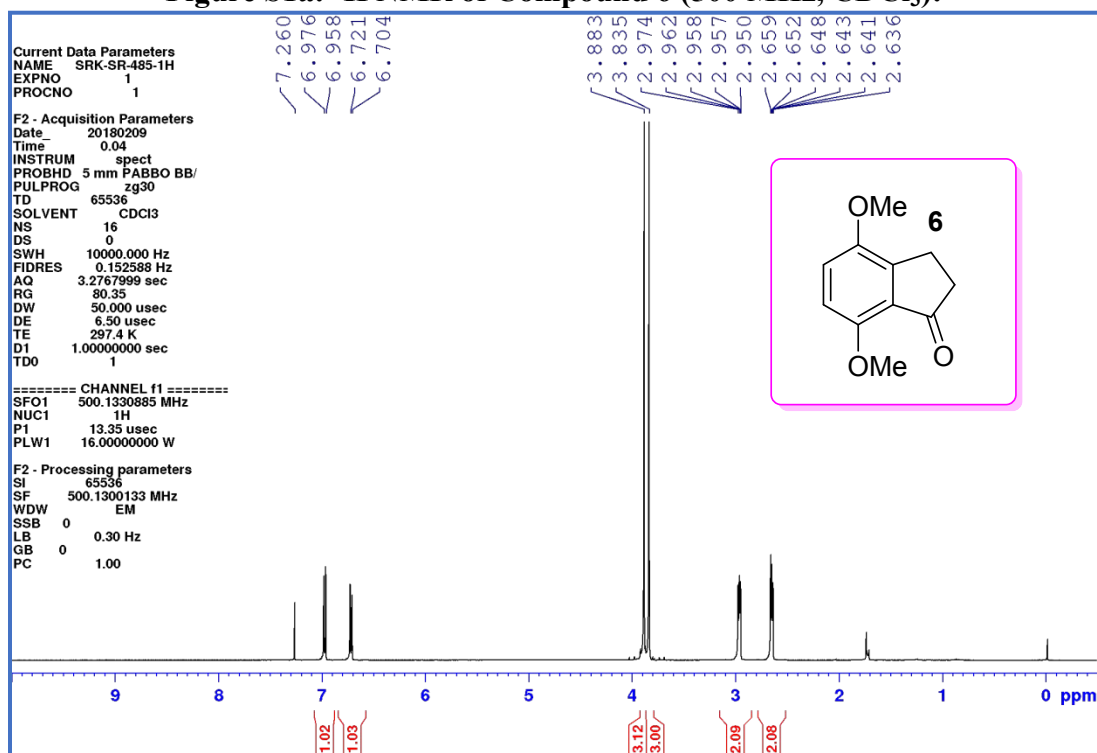

Figure S1b:  $^{13}\text{C}$  NMR of Compound 6 (125 MHz,  $\text{CDCl}_3$ ):

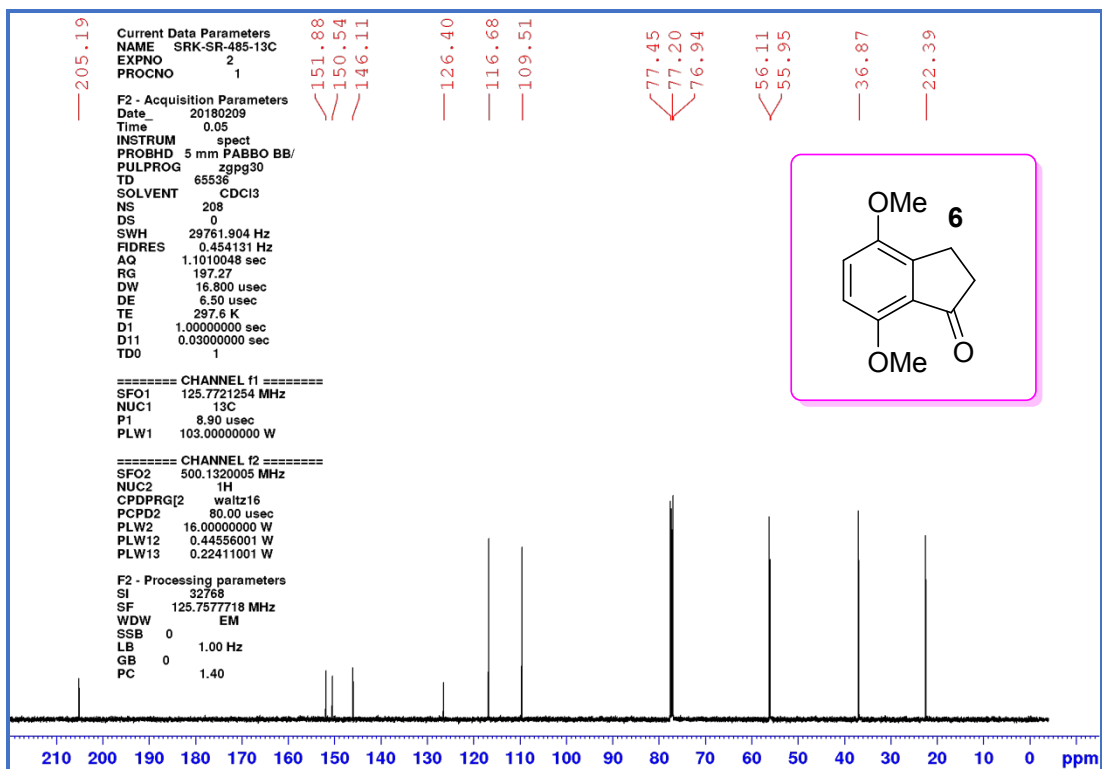

Figure S1c: DEPT 135 NMR of Compound 6 (125 MHz, CDCl<sub>3</sub>):

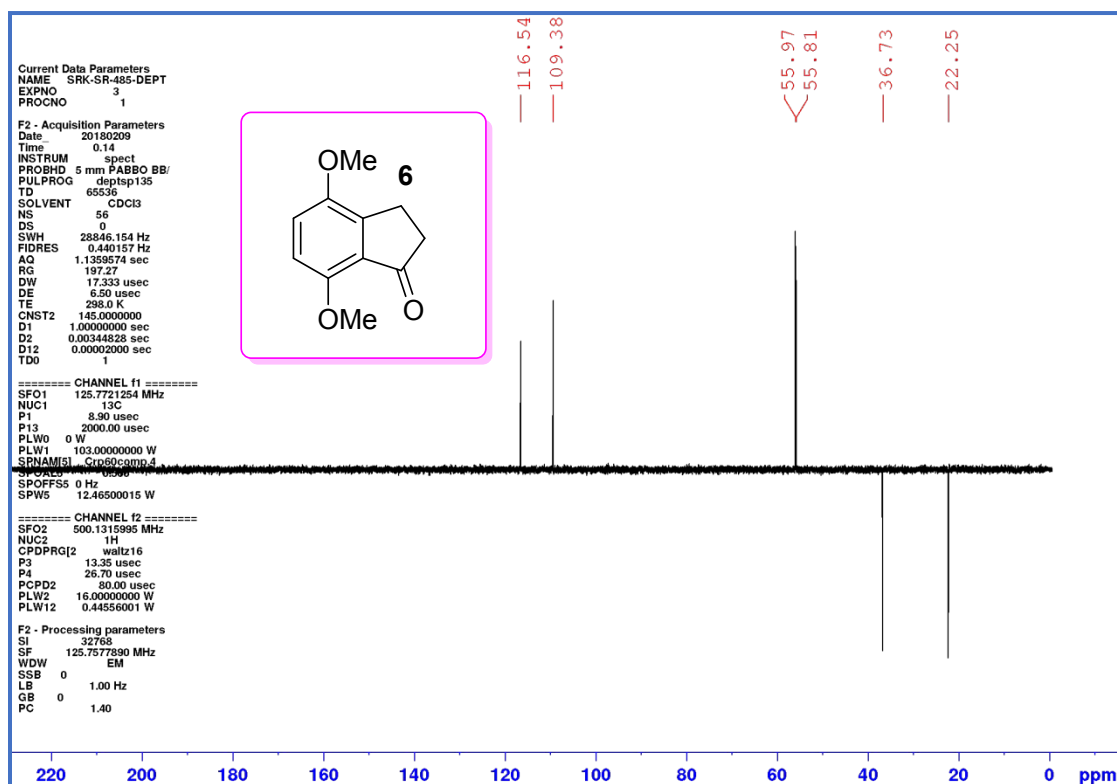

Figure S2a: <sup>1</sup>H NMR of Compound 10 (500 MHz, CDCl<sub>3</sub>):

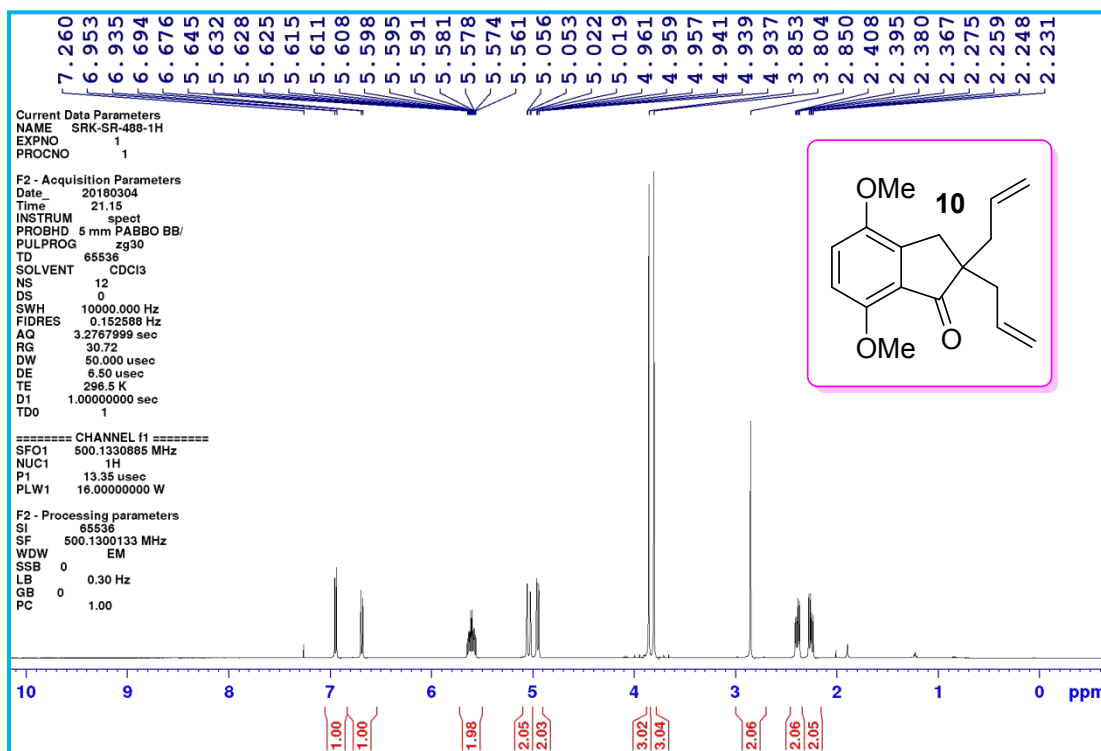

Figure S2b:  $^{13}\text{C}$  NMR of Compound 10 (125 MHz,  $\text{CDCl}_3$ ):

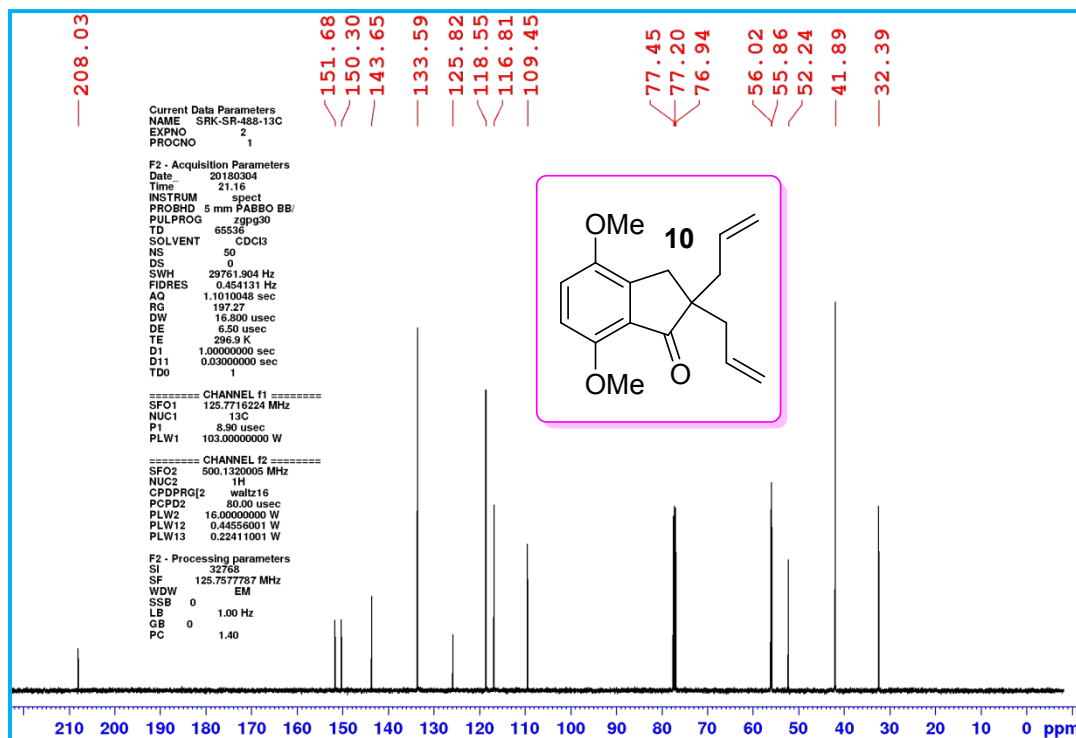

Figure S2c: DEPT 135 NMR of Compound 10 (125 MHz,  $\text{CDCl}_3$ ):

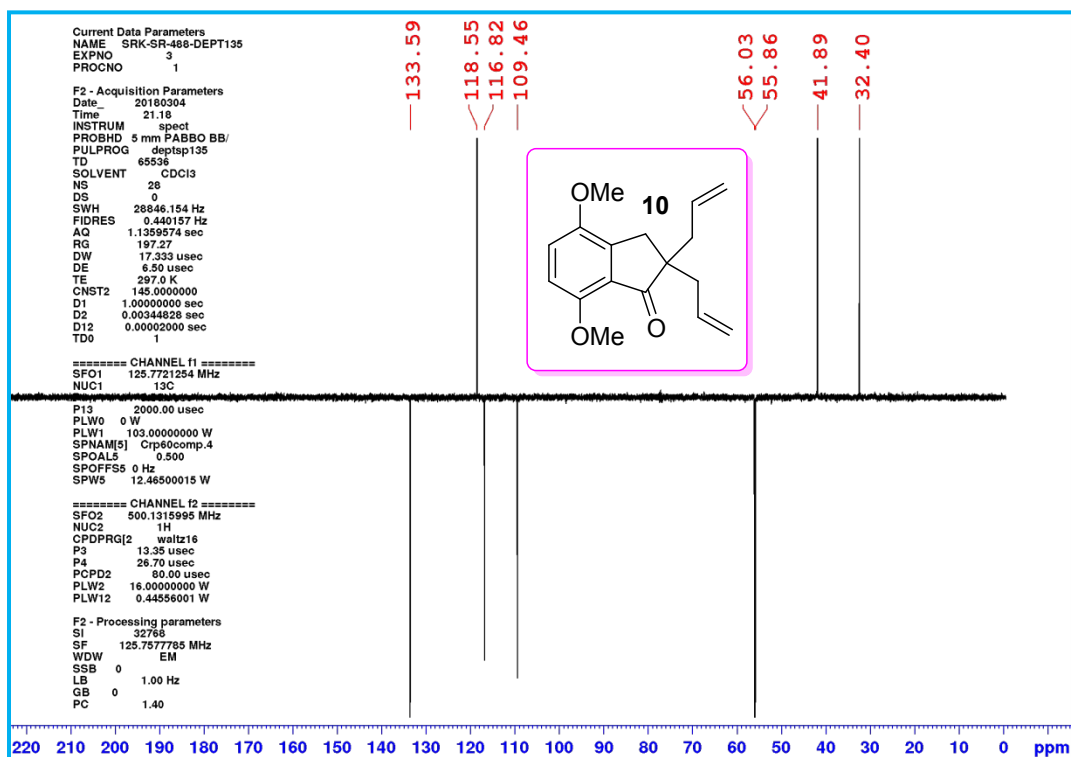

Figure S3a:  $^1\text{H}$  NMR of Compound 5 (400 MHz,  $\text{CDCl}_3$ ):

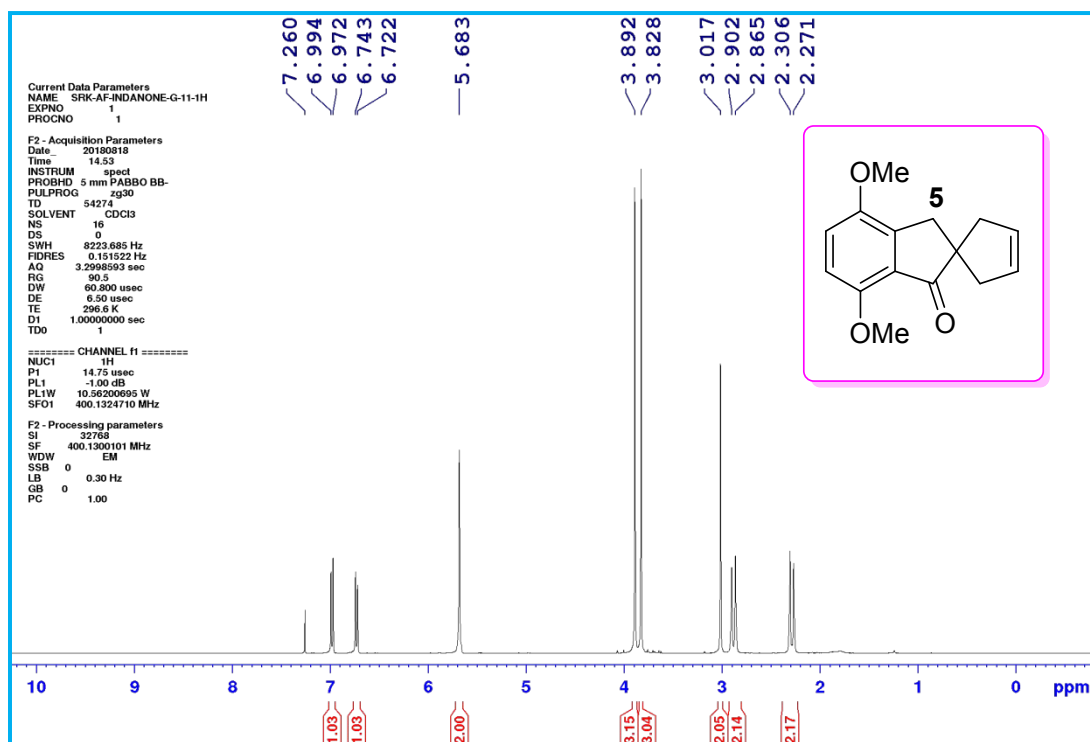

Figure S3b:  $^{13}\text{C}$  NMR of Compound 5 (100 MHz,  $\text{CDCl}_3$ ):

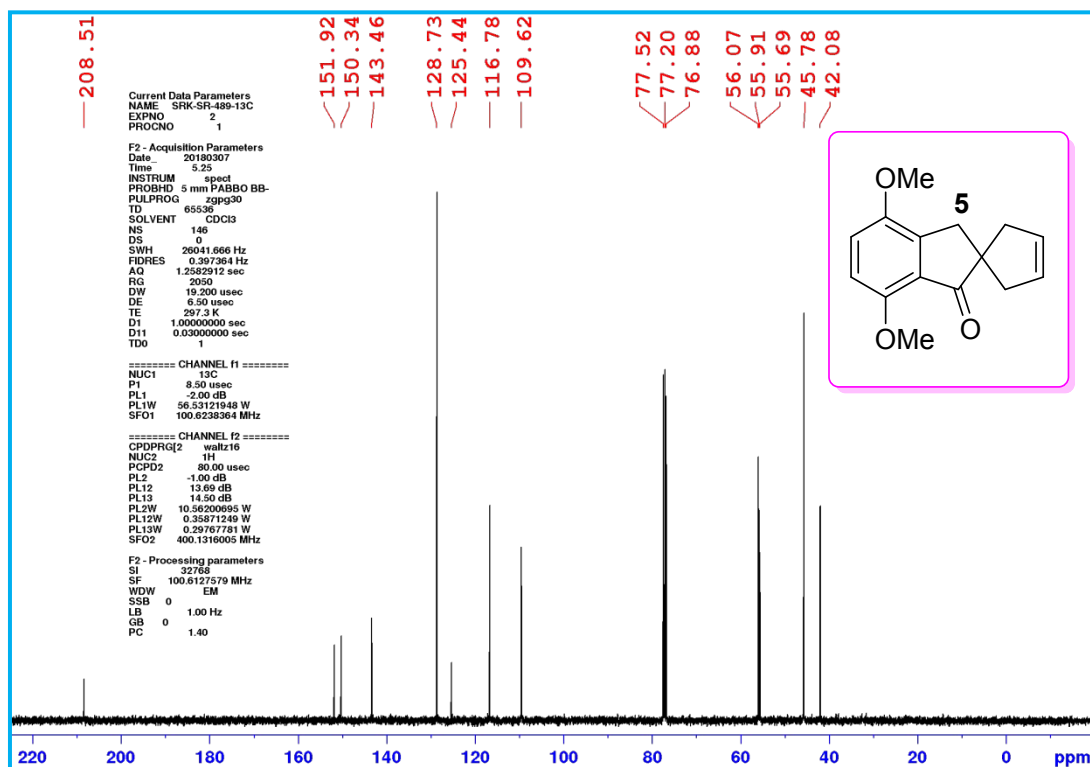

Figure S3c: DEPT 135 NMR of Compound 5 (100 MHz, CDCl<sub>3</sub>):

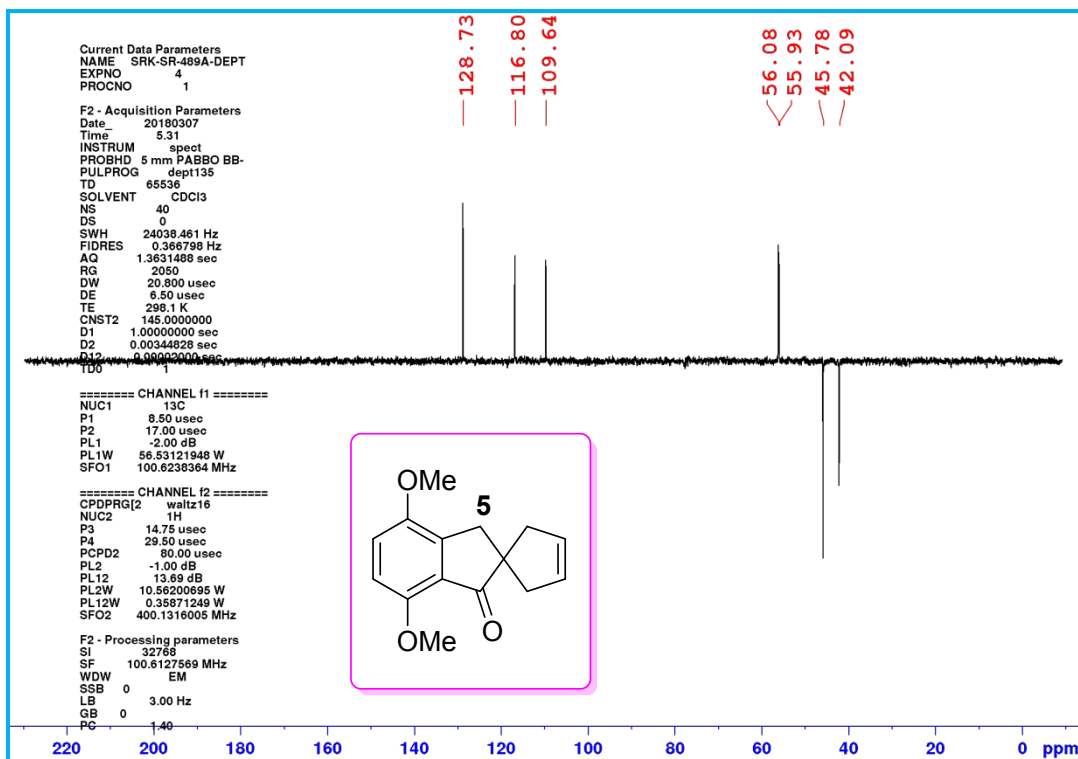

Figure S4a: <sup>1</sup>H NMR of Compound 11 (400 MHz, CDCl<sub>3</sub>):

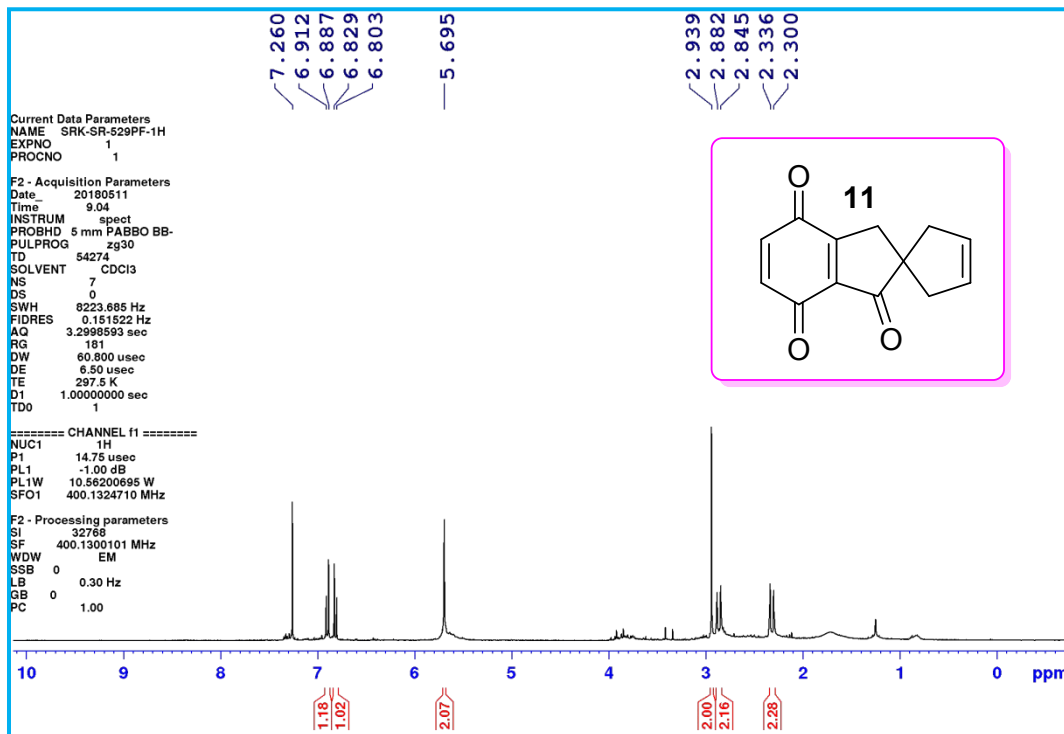

Figure S4b:  $^{13}\text{C}$  NMR of Compound 11 (125 MHz,  $\text{CDCl}_3$ ):

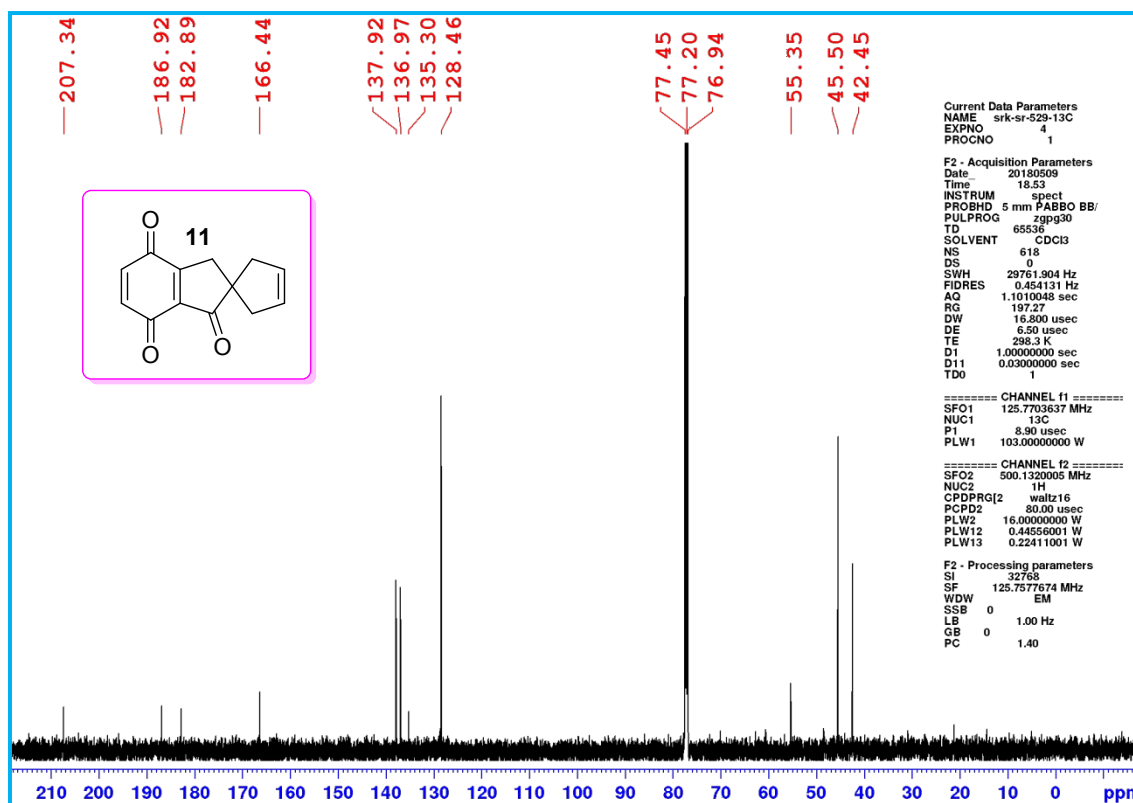

Figure S4c: DEPT 135 NMR of Compound 11 (125 MHz,  $\text{CDCl}_3$ ):

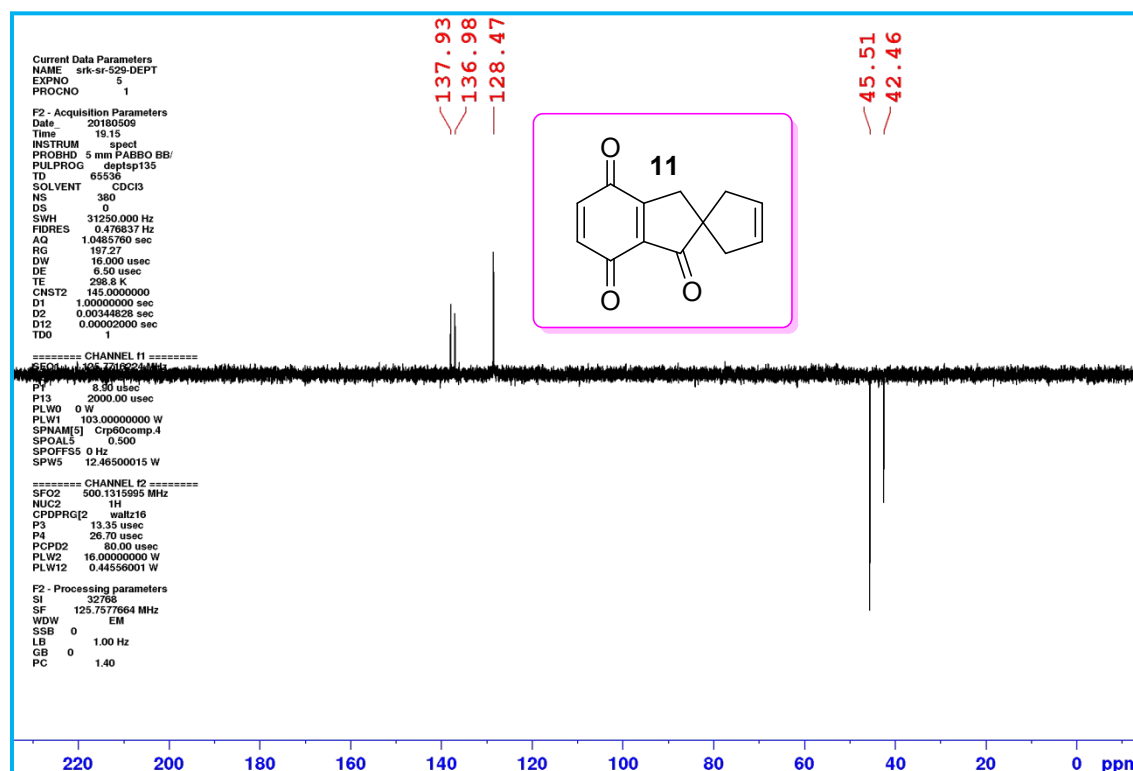



Figure S5a:  $^1\text{H}$  NMR of Compound 12 (500 MHz,  $\text{CDCl}_3$ ):

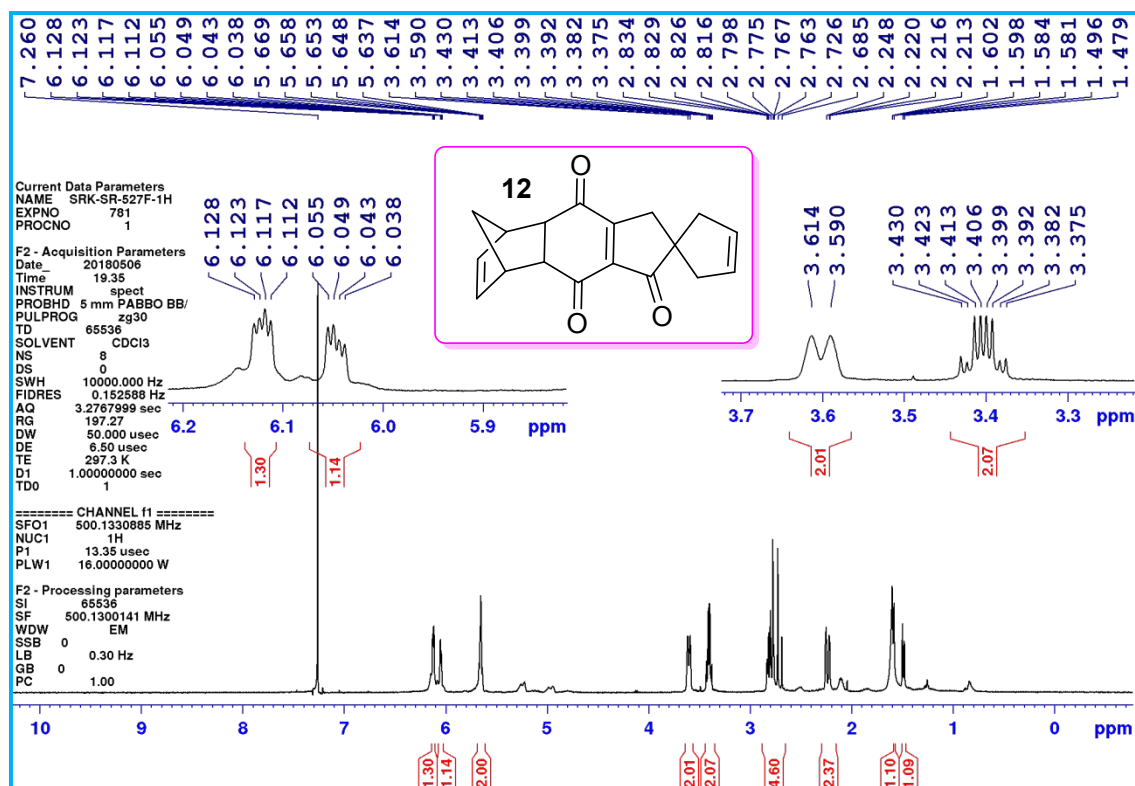

Figure S5b:  $^{13}\text{C}$  NMR of Compound 12 (500 MHz,  $\text{CDCl}_3$ ):

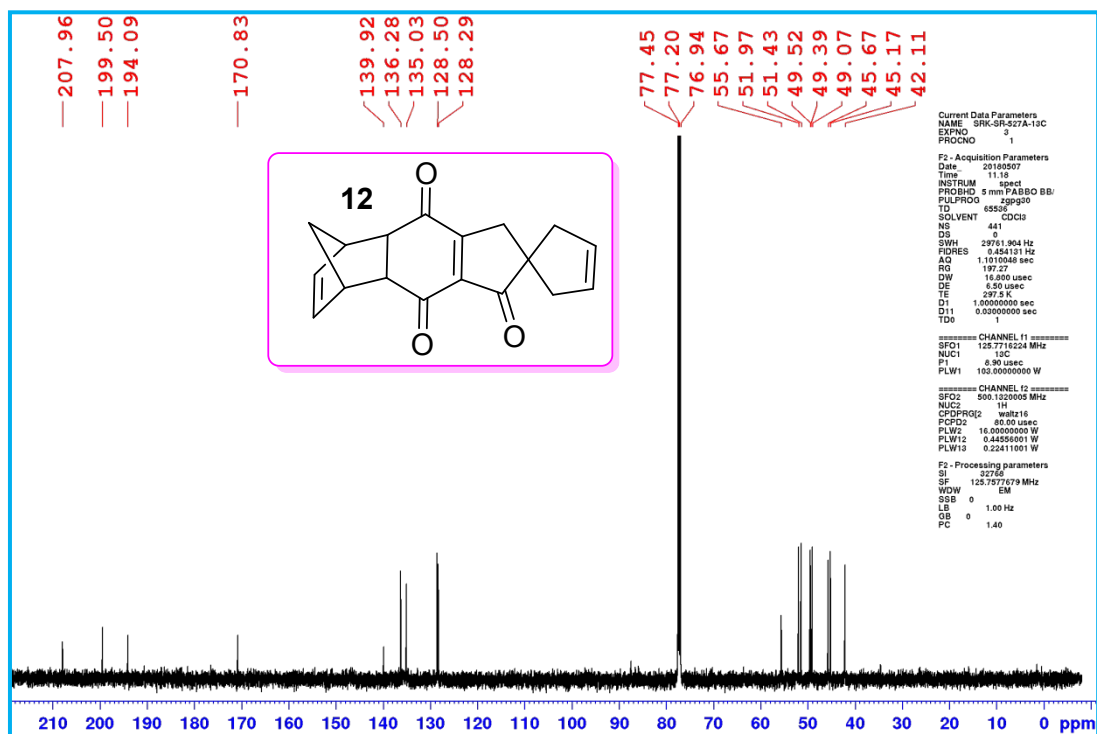

Figure S5c: DEPT 135 NMR of Compound 12 (500 MHz, CDCl<sub>3</sub>):

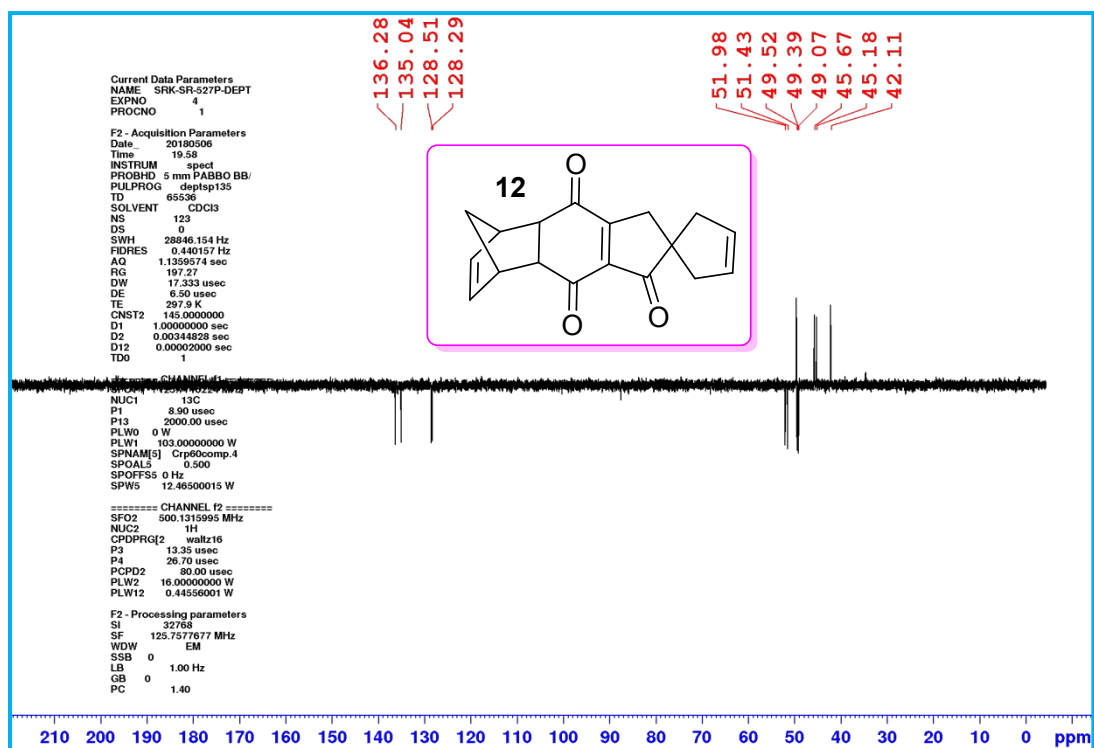

Figure S6a: <sup>1</sup>H NMR of Compound 4 (400 MHz, CDCl<sub>3</sub>):

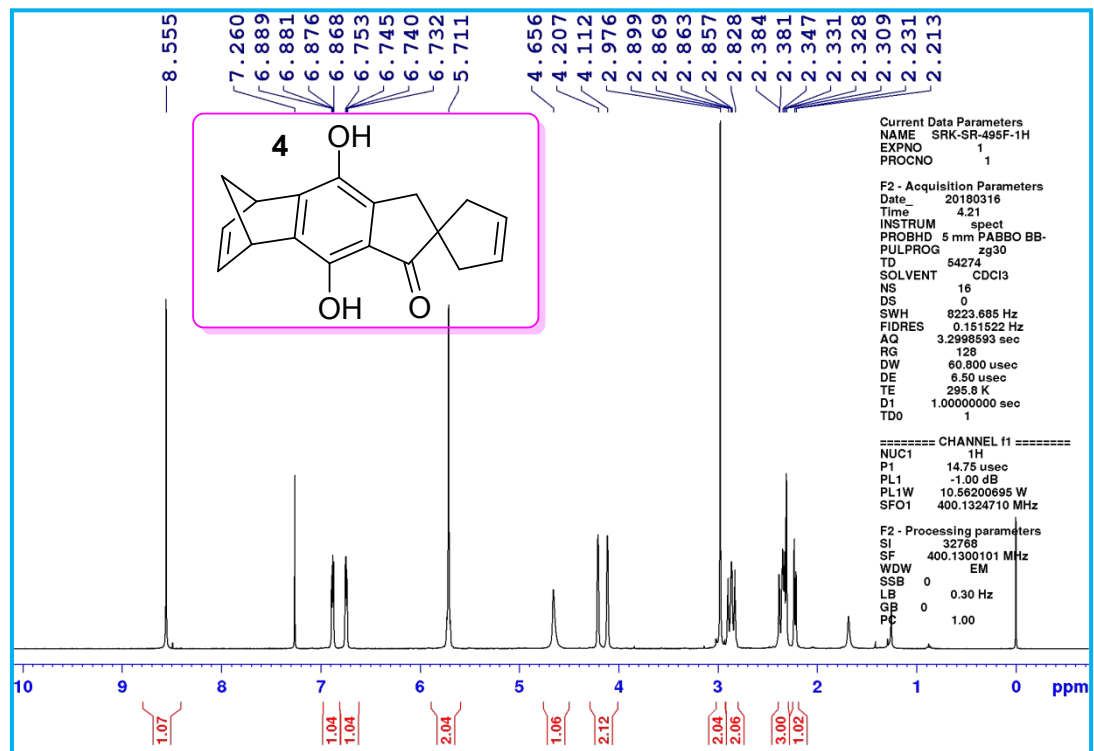

Figure S6b:  $^{13}\text{C}$  NMR of Compound 4 (125 MHz,  $\text{CDCl}_3$ ):

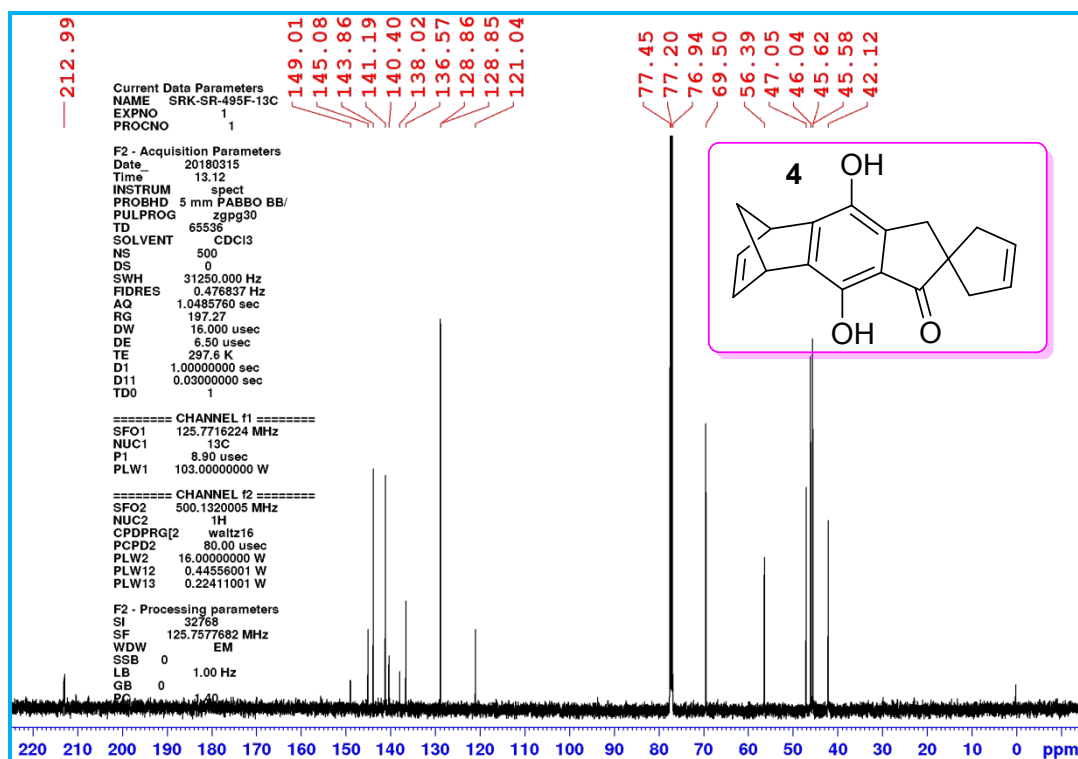

Figure S6c: DEPT 135 NMR of Compound 4 (125 MHz,  $\text{CDCl}_3$ ):

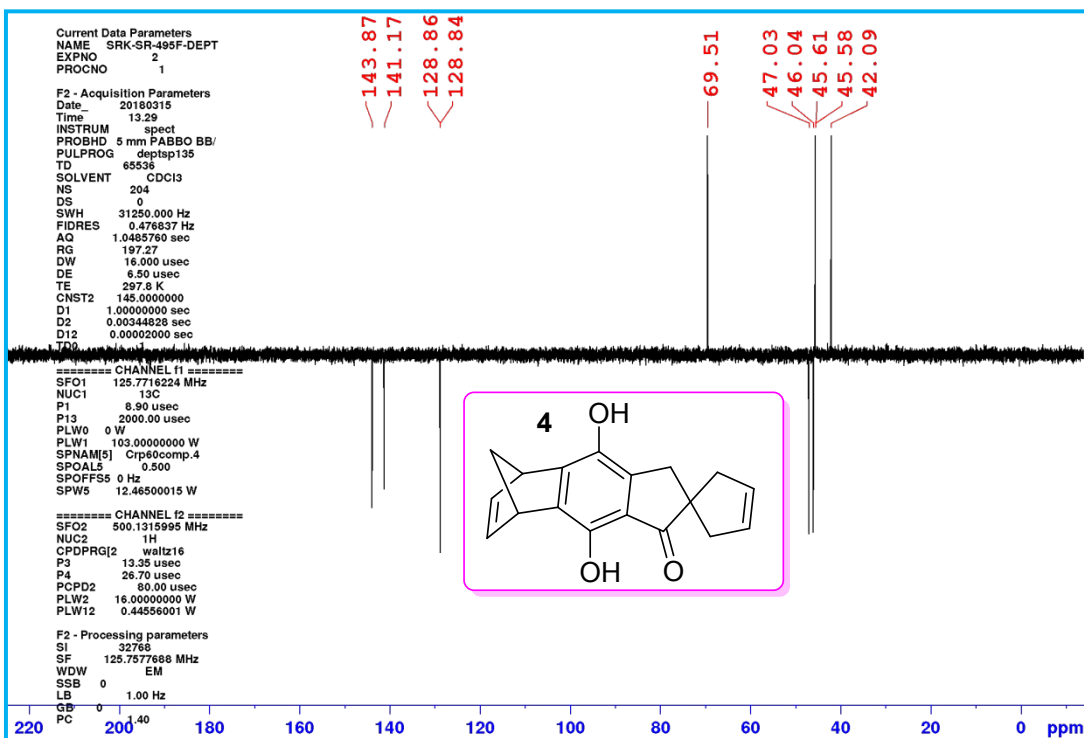

Figure S7a:  $^1\text{H}$  NMR of Compound 13 (500 MHz,  $\text{CDCl}_3$ ):

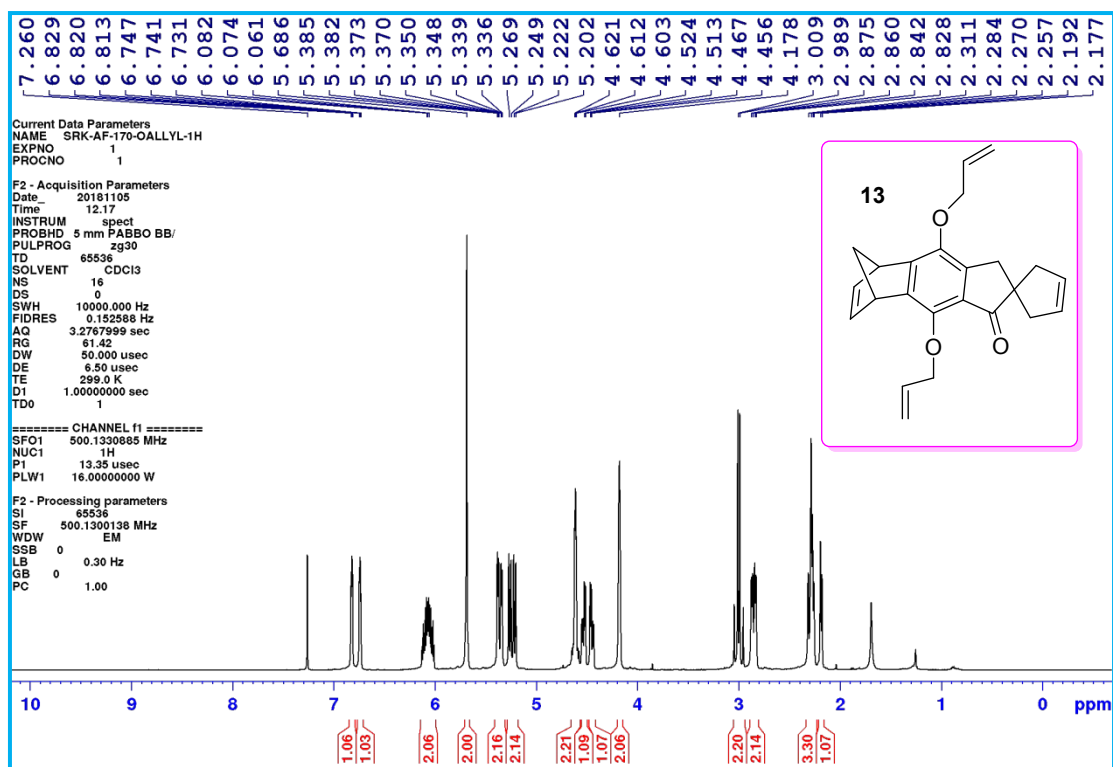

Figure S7b:  $^{13}\text{C}$  NMR of Compound 13 (125 MHz,  $\text{CDCl}_3$ ):

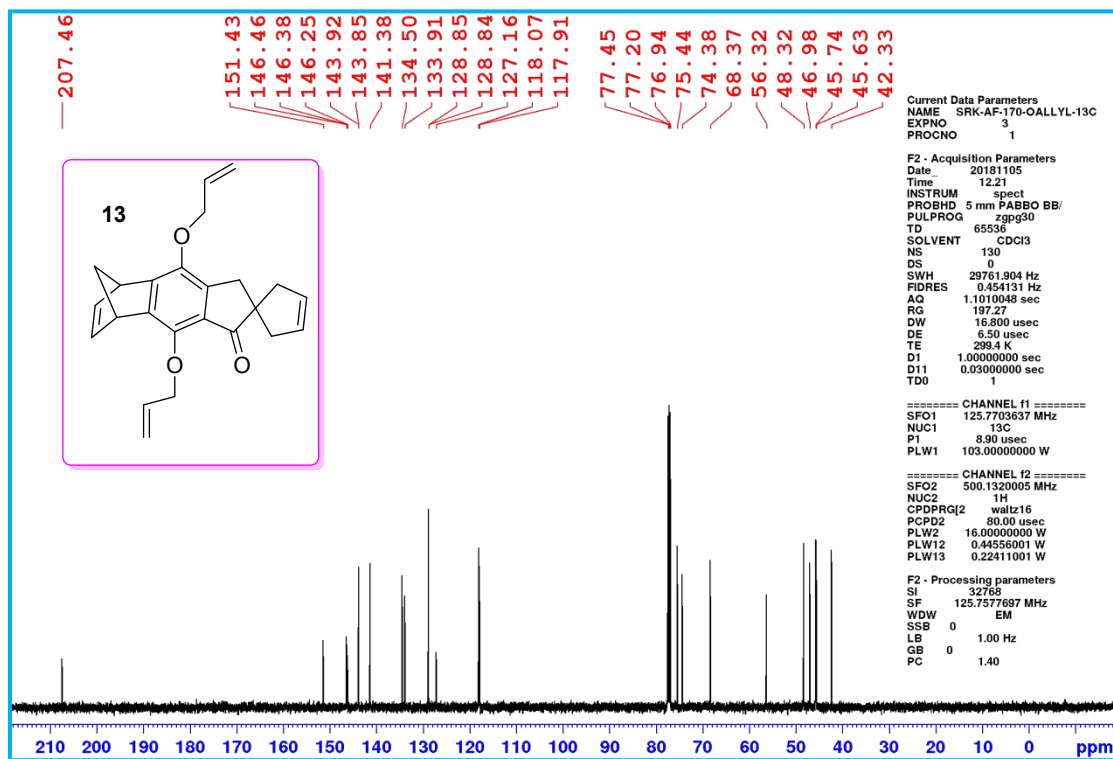

Figure S7c: DEPT 135 NMR of Compound 13 (125 MHz, CDCl<sub>3</sub>):

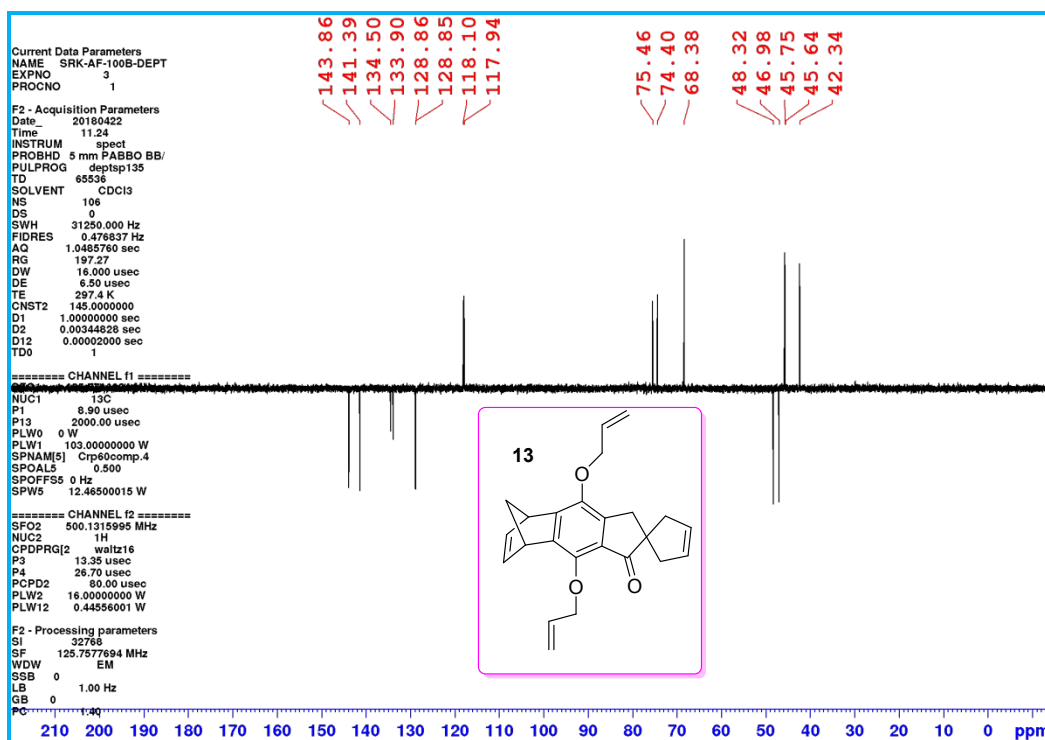

Figure S8a: <sup>1</sup>H NMR of Compound 3 (400 MHz, CDCl<sub>3</sub>):

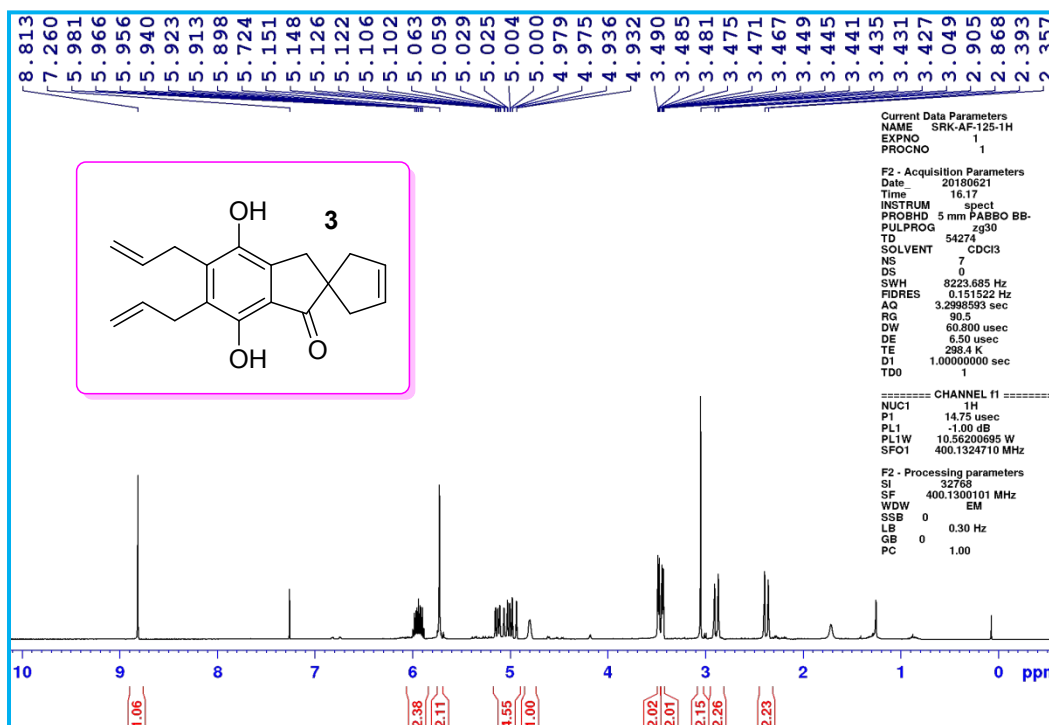

Figure S8b:  $^{13}\text{C}$  NMR of Compound 3 (100 MHz,  $\text{CDCl}_3$ ):

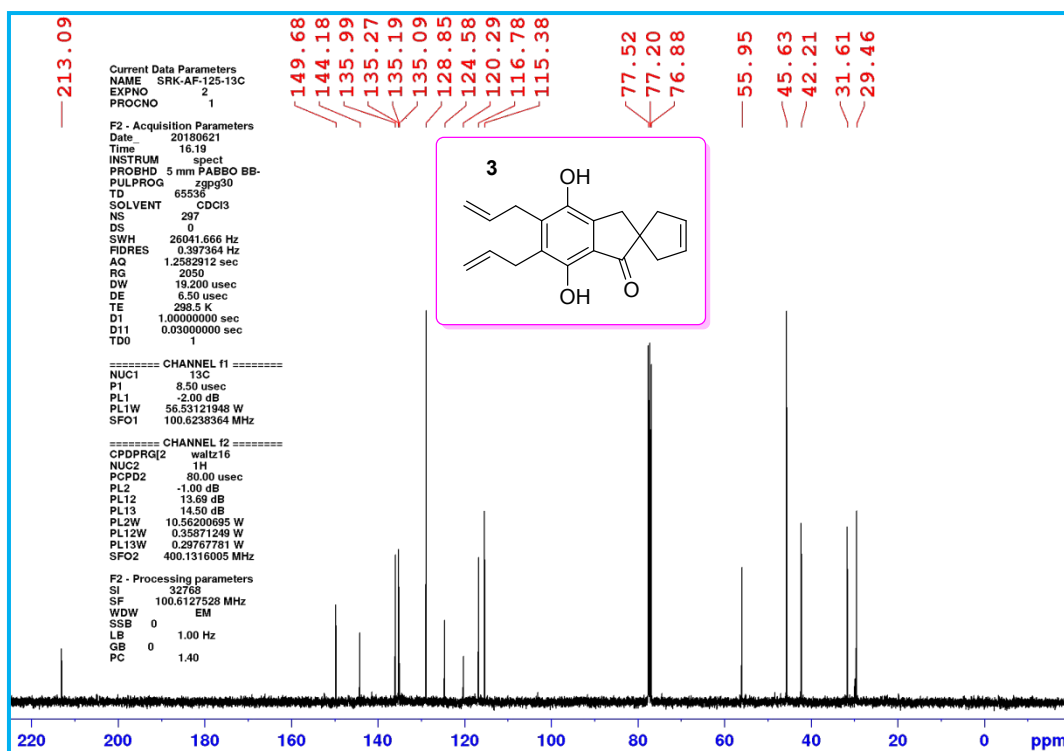

Figure S8c: DEPT 135 NMR of Compound 3 (100 MHz,  $\text{CDCl}_3$ ):

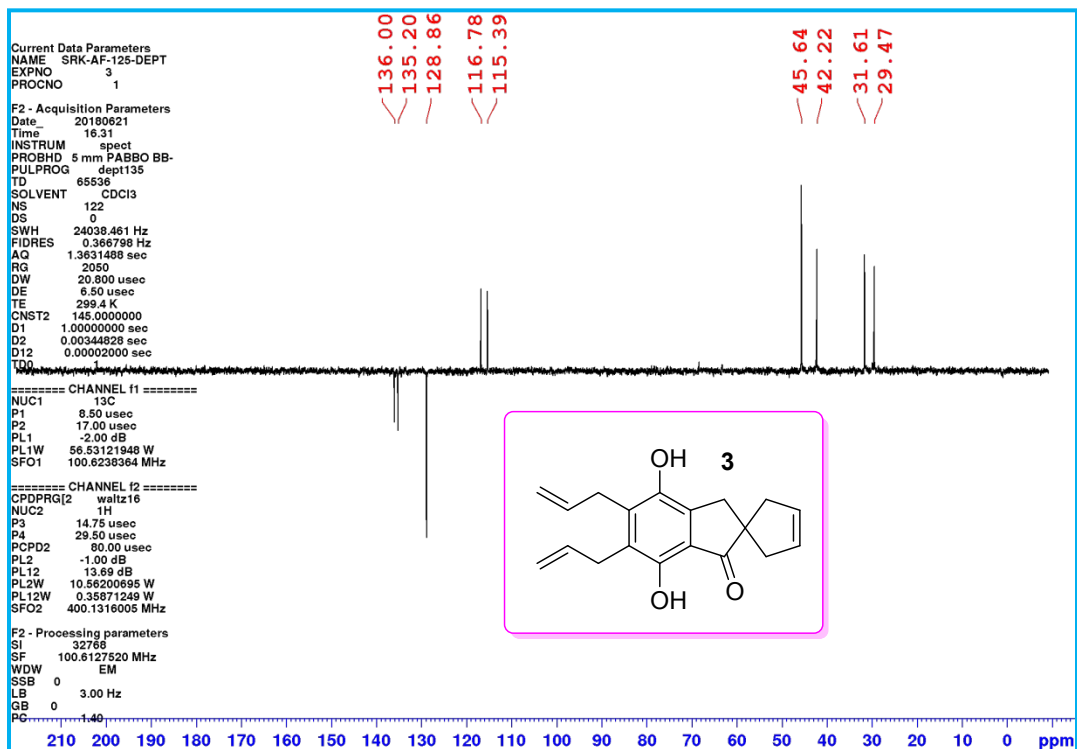

Figure S9a:  $^1\text{H}$  NMR of Compound 14 (500 MHz,  $\text{CDCl}_3$ ):

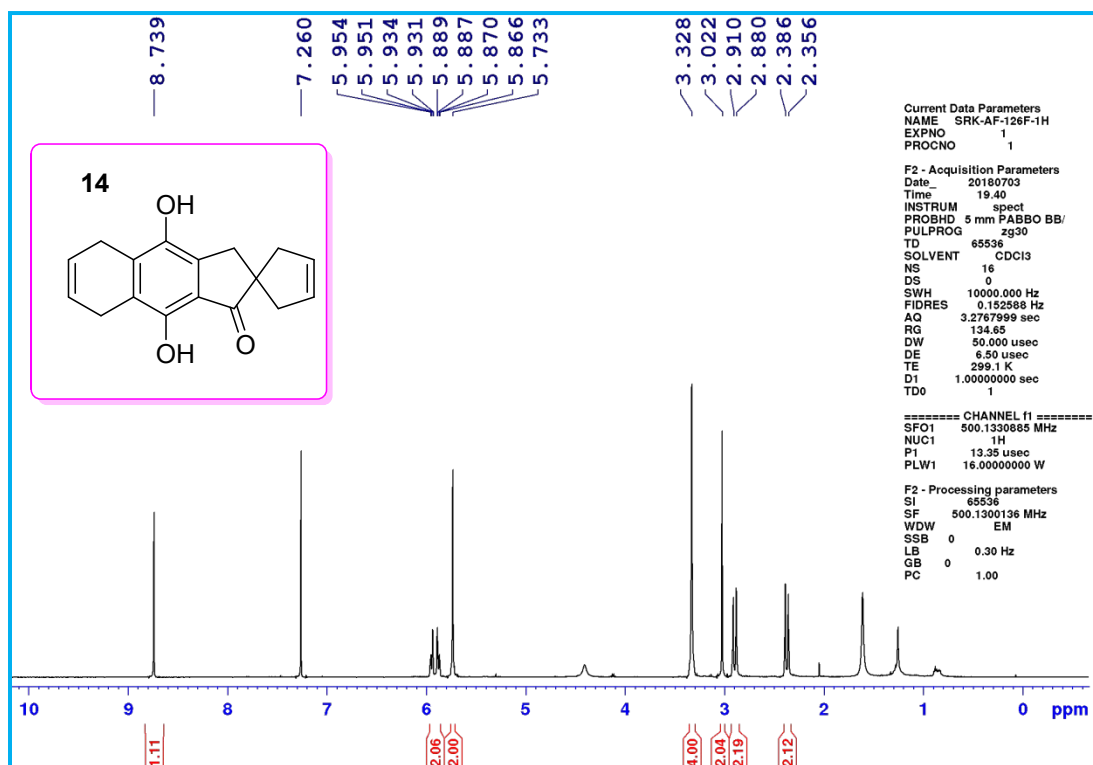

Figure S9b:  $^{13}\text{C}$  NMR of Compound 14 (125 MHz,  $\text{CDCl}_3$ ):

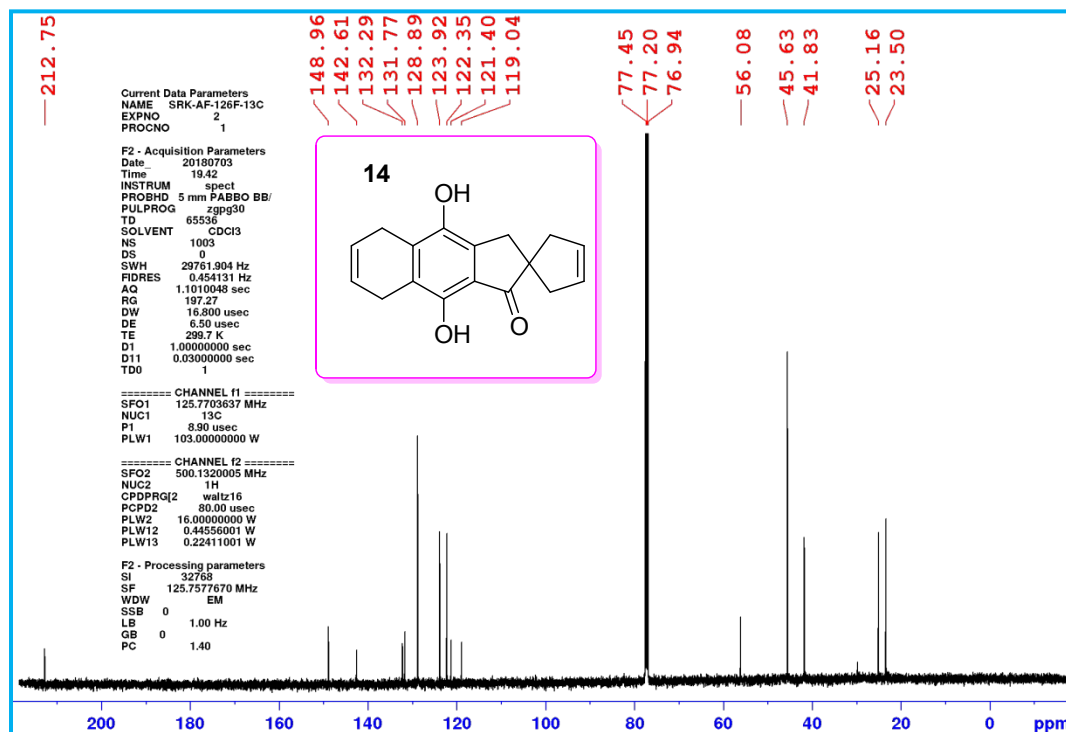

Figure S9c: DEPT 135 NMR of Compound 14 (125 MHz, CDCl<sub>3</sub>):

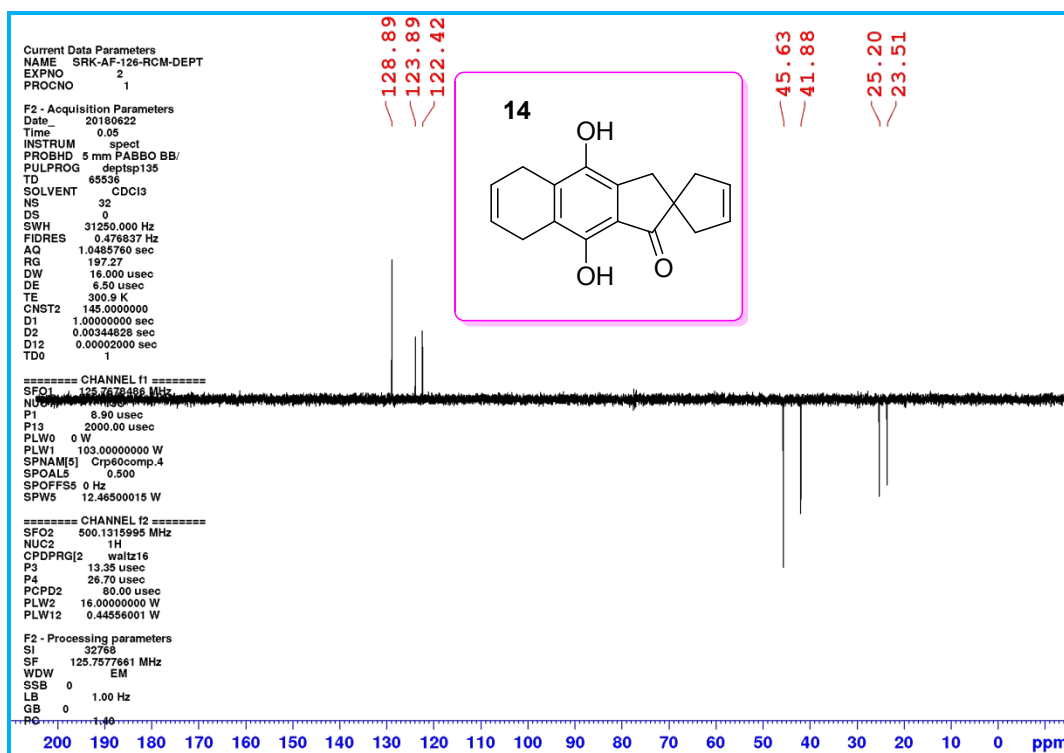

Figure S10a: <sup>1</sup>H NMR of Compound 2 (500 MHz, CDCl<sub>3</sub>):

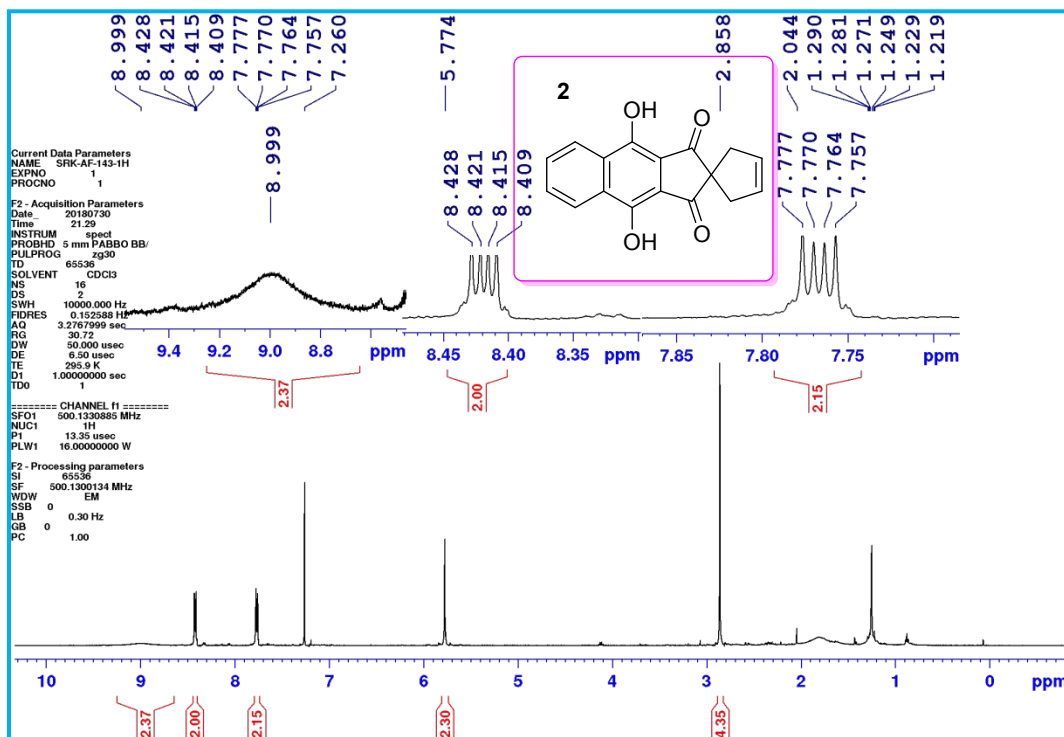



**Figure S10b:  $^{13}\text{C}$  NMR of Compound 2 (125 MHz,  $\text{CDCl}_3$ ):**

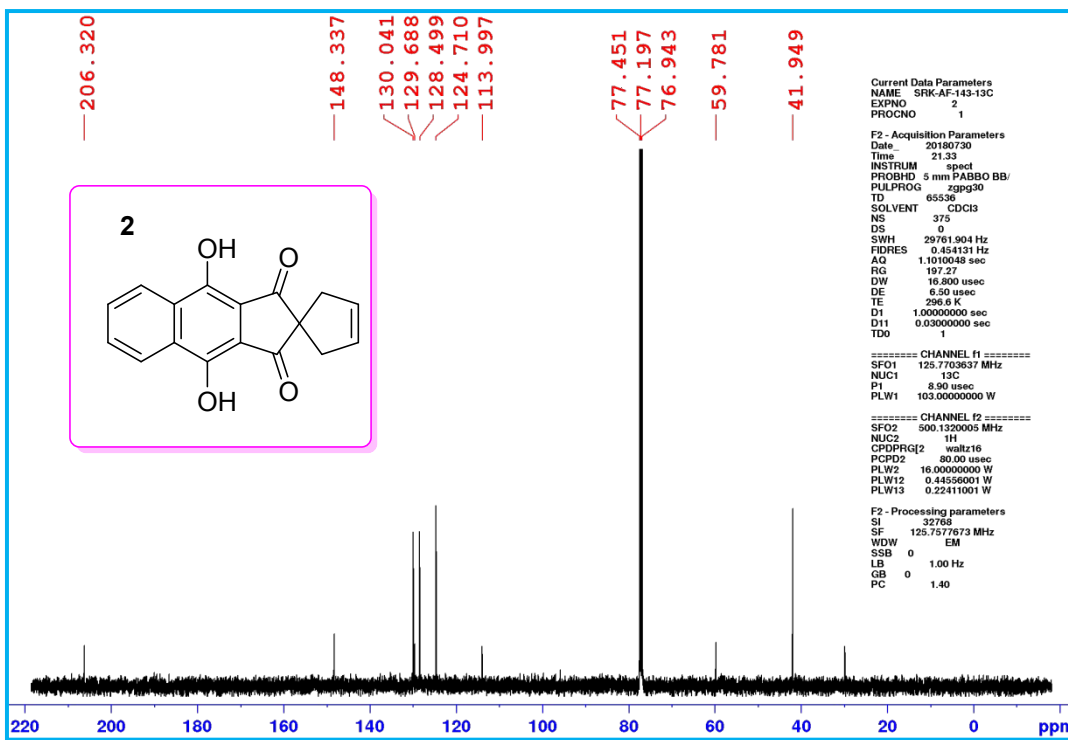

### HRMS data for compound 3F

# DEPARTMENT OF CHEMISTRY, I.I.T.(B)

## Analysis Info

Analysis Name D:\Data\JULY-19\SRK-AF-RETROA2.d  
Method Tune\_pos\_500\_NAF-05-07-2019.m  
Sample Name SRK-AF-RETROA2  
Comment C19H18O3

Acquisition Date 7/17/2019 8:06:16 PM

Operator kpk  
Instrument maXis impact 282001.00081

## Acquisition Parameter

| Source Type | ESI      | Ion Polarity          | Positive   | Set Nebulizer    | 0.3 Bar   |
|-------------|----------|-----------------------|------------|------------------|-----------|
| Focus       | Active   | Set Capillary         | 4500 V     | Set Dry Heater   | 180 °C    |
| Scan Begin  | 50 m/z   | Set End Plate Offset  | -500 V     | Set Dry Gas      | 4.0 l/min |
| Scan End    | 1000 m/z | Set Collision Cell RF | 1200.0 Vpp | Set Divert Valve | Source    |

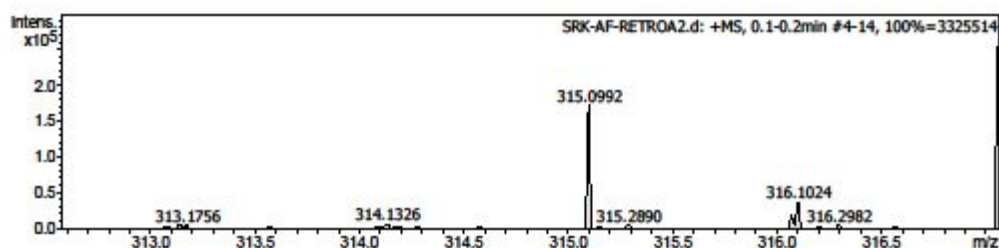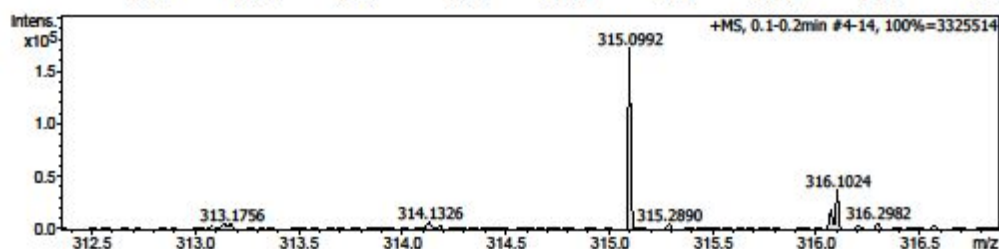

| Meas. m/z | # | Ion Formula | m/z      | err [ppm] | mSigma | # Sigma | Score  | rdB  | e <sup>-</sup> Conf | N-Rule |
|-----------|---|-------------|----------|-----------|--------|---------|--------|------|---------------------|--------|
| 315.0992  | 1 | C19H16NaO3  | 315.0992 | 0.0       | 15.8   | 1       | 100.00 | 11.5 | even                | ok     |

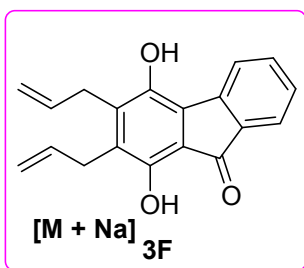

# DEPARTMENT OF CHEMISTRY, I.I.T.(B)

## Analysis Info

Analysis Name D:\Data\JULY-19\SRK-AF-RETROA1.d  
Method Tune\_pos\_500\_NAF-05-07-2019.m  
Sample Name SRK-AF-RETROA1  
Comment C19H16O3

Acquisition Date 7/17/2019 7:58:25 PM

Operator kpk  
Instrument maXis impact 282001.00081

## Acquisition Parameter

|             |          |                       |            |                  |           |
|-------------|----------|-----------------------|------------|------------------|-----------|
| Source Type | ESI      | Ion Polarity          | Positive   | Set Nebulizer    | 0.3 Bar   |
| Focus       | Active   | Set Capillary         | 4500 V     | Set Dry Heater   | 180 °C    |
| Scan Begin  | 50 m/z   | Set End Plate Offset  | -500 V     | Set Dry Gas      | 4.0 l/min |
| Scan End    | 1000 m/z | Set Collision Cell RF | 1200.0 Vpp | Set Divert Valve | Source    |

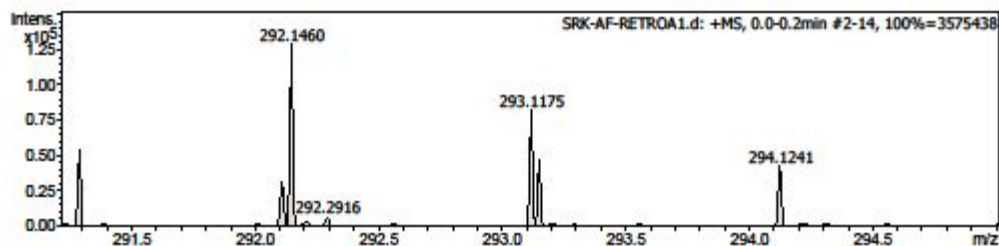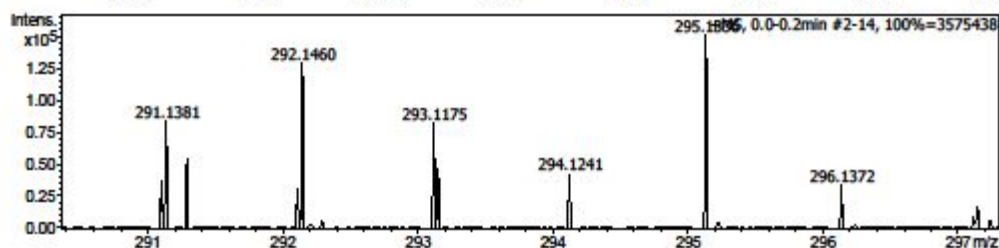

| Meas. m/z | # | Ion Formula | m/z      | err [ppm] | mSigma | # Sigma | Score  | rdB  | e <sup>-</sup> Conf | N-Rule |
|-----------|---|-------------|----------|-----------|--------|---------|--------|------|---------------------|--------|
| 293.1175  | 1 | C19H17O3    | 293.1172 | -1.0      | 176.3  | 1       | 100.00 | 11.5 | even                | ok     |

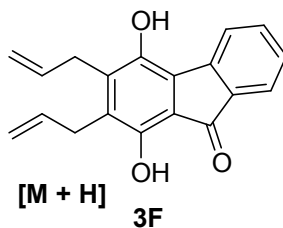

Supplement: Supplementary file 1 [file 17991062]
